# Supplementary material for: NOD × 129.H2g7Backcross Delineates 129S1/SvImJ-Derived Genomic Regions Modulating Type 1 Diabetes Development in Mice
Source: Oxford University Press journal article supplement (doi:10.2337/db09-0120), 2009-03-31
Supplement: db09-0120_online_appendix.doc [file db09-0120_online_appendix.doc]

**Supplement Table A1. SNPs used in 129S1/SvImJ-h2g7 speed congenic development**

| **. Marker** | 129S1 | NOD |
| --- | --- | --- |
| 01-005230167-M | T | C |
| 01-022154835-M | T | C |
| 01-043168343-M | A | C |
| 01-050957023-N | T | C |
| 01-067230857-N | G | T |
| 01-076327762-M | A | C |
| 01-091206918-N | G | A |
| 01-110152038-M | G | T |
| 01-122539474-N | A | G |
| 01-137189321-M | C | T |
| 01-157000923-M | G | A |
| 01-172244784-N | A | C |
| 01-193173300-M | A | G |
|  |  |  |
| 02-003179310-M | A | G |
| 02-043953410-M | T | C |
| 02-063356615-N | G | A |
| 02-083047417-M | G | T |
| 02-098132688-M | A | G |
| 02-117015987-M | A | G |
| 02-122995884-M | A | G |
| 02-144976817-N | A | C |
| 02-166115846-M | C | T |
| 02-176114999-M | T | G |
|  |  |  |
| 03-007561998-N | T | C |
| 03-017511270-N | C | T |
| 03-036328929-N | G | A |
| 03-055513690-N | T | C |
| 03-075336142-M | G | A |
| 03-093995376-N | A | C |
| 03-105433755-M | C | T |
| 03-124203459-N | C | A |
| 03-144955281-N | T | A |
| 03-160287200-M | A | G |
|  |  |  |
| 04-003163167-M | T | G |
| 04-019063943-M | G | C |
| 04-055642665-N | A | G |
| 04-075869463-M | G | A |
| 04-095346075-M | C | T |
| 04-114064127-N | A | G |
| 04-134479394-N | G | A |
| 04-147973154-M | G | C |
|  |  |  |
| 05-009804084-N | A | G |
| 05-023890459-M | G | C |
| 05-065089744-M | A | G |
| 05-084120220-M | T | G |
| 05-105315802-N | T | C |
| 05-127072402-M | A | G |
| 05-147904991-M | C | A |
|  |  |  |
| 06-006170915-M | A | T |
| 06-023207025-M | A | G |
| 06-045126062-M | G | A |
| 06-062599520-M | G | A |
| 06-083216741-M | T | G |
| 06-093376618-M | C | T |
| 06-114232644-M | G | A |
| 06-128926170-M | T | C |
| 06-146079591-M | C | A |
|  |  |  |
| 07-011167675-M | T | C |
| 07-029991530-M | T | C |
| 07-044964980-M | C | G |
| 07-065183517-M | T | G |
| 07-084052305-M | A | G |
| 07-105176626-M | G | A |
| 07-124090029-M | G | A |
| 07-135024189-M | T | C |
|  |  |  |
| 08-003089774-M | C | T |
| 08-016815694-M | C | T |
| 08-032986730-M | T | C |
| 08-074679809-N | T | A |
| 08-095444189-N | C | T |
| 08-123340602-N | T | C |
|  |  |  |
| 09-008107689-M | C | T |
| 09-029233439-N | A | G |
| 09-046117336-N | G | A |
| 09-074179540-M | C | G |
| 09-089891382-M | A | C |
| 09-115037423-M | A | G |
| 09-122337931-M | A | G |
|  |  |  |
| 10-003233934-M | C | G |
| 10-020086252-M | C | T |
| *10-042788082-N* | *C* | *T* |
| 10-070466216-N | A | G |
| 10-092128703-M | A | G |
| 10-120289167-M | A | G |
| 10-129117100-M | A | G |
|  |  |  |
| 11-008353761-M | C | G |
| 11-026438204-M | G | A |
| 11-041505703-M | G | T |
| 11-057005736-N | G | A |
| 11-067354464-M | A | G |
| 11-072769004-N | T | C |
| 11-093918880-N | T | C |
| 11-118804416-N | A | G |
| 11-122195777-M | T | C |
|  |  |  |
| 12-003567042-M | T | G |
| 12-016244499-M | A | G |
| 12-034563785-M | G | C |
| 12-054303300-M | A | C |
| 12-077362373-M | C | G |
| 12-095091501-N | G | T |
| 12-110383990-N | A | C |
|  |  |  |
| 13-004607731-N | T | C |
| 13-013772045-M | G | T |
| 13-030913320-M | C | T |
| 13-037832161-M | T | A |
| 13-067739853-M | T | C |
| 13-082184874-M | A | G |
| 13-105849719-M | G | A |
| 13-117094028-M | A | G |
|  |  |  |
| 14-003066925-M | C | T |
| 14-020426806-M | G | A |
| 14-031978791-N | G | A |
| 14-054014360-M | G | C |
| 14-071324217-N | T | G |
| 14-093080383-M | A | G |
| 14-114403652-M | T | C |
|  |  |  |
| 15-003094890-M | G | A |
| 15-022235389-M | G | A |
| 15-041919640-N | C | T |
| 15-059754938-N | T | C |
| 15-087100507-M | A | G |
| 15-102788257-N | T | G |
|  |  |  |
| 16-005053446-C | T | G |
| 16-025179119-C | C | G |
| 16-046056902-C | T | G |
| 16-064088849-C | G | A |
| 16-090091107-C | A | C |
| 16-095103053-C | G | C |
|  |  |  |
| 17-003335010-M | C | G |
| 17-025166339-M | G | A |
| 17-033309559-N | A | G |
| 17-050794277-N | A | C |
| 17-070197589-M | C | G |
| 17-092673068-N | G | T |
|  |  |  |
| 18-005066417-M | C | T |
| 18-019171445-M | G | A |
| 18-043868444-M | C | A |
| 18-065947946-M | G | T |
| 18-090060367-M | T | G |
|  |  |  |
| 19-005218596-N | T | C |
| 19-027361577-M | T | A |
| 19-058179075-M | A | G |
| 19-060823449-N | G | A |
|  |  |  |

**Supplement Table A2. SNPs used in first backcross analysis**

| Marker | MB | 129S1 | NOD |
| --- | --- | --- | --- |
| 01-005230167-M | 5.22 | T | C |
| 01-023061064-M | 22.68 | C | A |
| 01-031264126-M | 30.89 | C | T |
| 01-043168343-M | 42.71 | A | C |
| 01-050957023-N | 50.45 | T | C |
| 01-067230857-N | 66.65 | G | T |
| 01-080181487-M | 79.3 | T | A |
| 01-086182722-M | 87.69 | G | A |
| 01-091206918-N | 92.68 | G | A |
| 01-110152038-M | 111.43 | G | T |
| 01-112993479-M | 114.25 | T | C |
| 01-114000704-M | 115.25 | A | G |
| 01-116035688-M | 117.27 | G | A |
| 01-124147455-M | 125.3 | A | G |
| 01-126655393-N | 127.76 | A | C |
| 01-127974550-M | 129.09 | G | A |
| 01-129114100-M | 130.22 | G | A |
| 01-132126870-M | 133.19 | C | A |
| 01-133333737-M | 134.38 | C | T |
| 01-137189321-M | 138.21 | C | T |
| 01-143006008-M | 143.99 | G | A |
| 01-145040115-M | 146.03 | G | A |
| 01-147325075-M | 148.3 | T | A |
| 01-152031524-M | 152.97 | T | C |
| 01-157000923-M | 157.89 | G | A |
| 01-159058371-M | 159.87 | T | C |
| 01-162977516-M | 163.73 | A | G |
| 01-165583809-M | 166.32 | C | G |
| 01-168005000-P | 169.91 | G | C |
| 01-172244784-N | 172.89 | A | C |
| 01-182577000-P | 184.42 | A | G |
| 01-185085000-P | 187.27 | C | T |
| 01-187052090-M | 187.76 | C | A |
| 01-189820000-P | 191.78 | A | G |
| 01-194803746-N | 195.1 | G | T |
| 02-003179310-M | 3.15 | A | G |
| 02-020551513-M | 20.29 | G | A |
| 02-035397177-N | 34.87 | T | C |
| 02-050206336-M | 49.57 | T | C |
| 02-060396986-G | 59.43 | T | C |
| 02-064172278-M | 63.29 | G | C |
| 02-070576940-N | 69.63 | A | T |
| 02-073039818-M | 72.05 | A | T |
| 02-078062303-M | 77.03 | G | T |
| 02-083047417-M | 81.98 | G | T |
| 02-088002203-M | 86.89 | G | A |
| 02-091263666-N | 89.69 | T | C |
| 02-098132688-M | 97.04 | A | G |
| 02-114758266-N | 113.67 | T | C |
| 02-122995884-M | 121.85 | A | G |
| 02-136425886-N | 134.59 | C | T |
| 02-148389584-N | 147.19 | G | A |
| 02-172943830-M | 171.57 | A | G |
| 03-007561998-N | 7.55 | T | C |
| 03-027974740-N | 28.08 | G | A |
| 03-036328929-N | 36.35 | G | A |
| 03-049202892-M | 48.77 | G | C |
| 03-065861493-N | 65.13 | G | A |
| 03-083127964-M | 82.24 | C | G |
| 03-087158136-M | 86.18 | C | G |
| 03-093995376-N | 93.1 | A | C |
| 03-100489838-M | 100.19 | A | G |
| 03-106170268-G | 105.65 | A | G |
| 03-118275656-M | 117.64 | T | C |
| 03-121126022-M | 120.47 | T | C |
| 03-124203459-N | 123.51 | C | A |
| 03-127463765-M | 126.68 | A | G |
| 03-133183187-M | 132.36 | T | C |
| 03-136177436-M | 135.36 | C | A |
| 03-139158872-M | 138.32 | A | G |
| 03-141110898-M | 140.26 | T | C |
| 03-148111378-M | 147.24 | C | T |
| 03-152200034-M | 151.27 | A | G |
| 03-155372777-M | 154.44 | T | C |
| 03-158497808-M | 157.55 | C | T |
| 03-160287200-M | 159.33 | A | G |
| 04-003163167-M | 3.65 | T | G |
| 04-019063943-M | 19.45 | G | C |
| 04-037053163-M | 37.36 | G | C |
| 04-055642665-N | 56.76 | A | G |
| 04-065107790-M | 67.44 | C | G |
| 04-075245266-N | 77.61 | A | G |
| 04-095346075-M | 97.25 | C | T |
| 04-114064127-N | 115.98 | A | G |
| 04-118905251-G | 120.44 | A | G |
| 04-124081318-M | 126.39 | A | G |
| 04-128694339-G | 130.28 | G | T |
| 04-130920254-G | 132.42 | C | T |
| 04-132955150-M | 134.93 | G | A |
| 04-134479394-N | 136.45 | G | A |
| 04-139845063-N | 141.66 | T | C |
| 04-147112521-M | 151.09 | A | C |
| 04-147973154-M | 151.94 | G | C |
| 05-003188964-M | 4.08 | T | C |
| 05-005088855-M | 8.78 | C | T |
| 05-009804084-N | 10.67 | A | G |
| 05-012105728-M | 13.15 | C | A |
| 05-013136419-M | 14.16 | C | T |
| 05-014236855-M | 15.34 | C | T |
| 05-015780506-G | 17.16 | T | C |
| 05-016694513-G | 18.07 | T | C |
| 05-018699795-N | 20.07 | A | G |
| 05-023890459-M | 24.92 | G | C |
| 05-029064177-N | 30.71 | G | A |
| 05-030544560-G | 32.62 | C | T |
| 05-034227107-M | 35.86 | G | C |
| 05-035182717-N | 36.81 | T | G |
| 05-055927945-M | 57.25 | A | T |
| 05-071883391-N | 73.19 | G | A |
| 05-105315802-N | 108.07 | T | C |
| 05-147904991-M | 149.75 | C | A |
| 06-006170915-M | 6.39 | A | T |
| 06-023207025-M | 23.2 | A | G |
| 06-042391222-N | 42.35 | A | G |
| 06-062599520-M | 62.01 | G | A |
| 06-083216741-M | 82.28 | T | G |
| 06-106057600-M | 105.17 | T | C |
| 06-109051116-M | 108.16 | C | T |
| 06-114232644-M | 113.27 | G | A |
| 06-119728826-G | 119 | A | T |
| 06-124881119-G | 124.01 | C | T |
| 06-128926170-M | 127.96 | T | C |
| 06-131929438-M | 131.26 | A | T |
| 06-134747045-G | 134.4 | T | C |
| 06-138971511-M | 138.51 | C | T |
| 06-141660661-P | 141.48 | G | A |
| 06-145007178-M | 144.36 | A | G |
| 06-149418744-P | 149.21 | C | A |
| 07-007210802-M | 11.03 | A | G |
| 07-016778161-M | 25.32 | G | A |
| 07-029991530-M | 47.58 | T | C |
| 07-044964980-M | 62.58 | C | G |
| 07-063768461-N | 81.46 | G | A |
| 07-084052305-M | 87.3 | A | G |
| Tyr 87.3 (coat color) | 101.45 |  |  |
| 07-099391547-M | 116.95 | T | C |
| 07-118004085-N | 136.39 | T | C |
| 07-135024189-M | 151.77 | T | C |
| 08-003089774-M | 3.19 | G | A |
| 08-005101158-M | 5.17 | A | T |
| 08-006942658-M | 7.01 | C | G |
| 08-009110239-M | 9.16 | G | A |
| 08-011103791-M | 11.14 | A | G |
| 08-013018476-M | 13.03 | A | G |
| 08-016815694-M | 16.81 | C | T |
| 08-032986730-M | 35.13 | T | C |
| 08-045080531-M | 47.01 | C | T |
| 08-047239384-M | 49.12 | G | C |
| 08-054093936-M | 55.94 | G | C |
| 08-071925175-M | 75.07 | T | G |
| 08-086985036-M | 89.79 | T | C |
| 08-095444189-N | 98.17 | C | T |
| 08-101099186-M | 103.8 | A | T |
| 08-103169720-M | 105.86 | C | T |
| 08-105254442-G | 108.31 | T | G |
| 08-106270969-N | 109.33 | C | T |
| 08-114059240-M | 116.65 | T | C |
| 08-115109448-M | 117.66 | C | T |
| 08-120862827-G | 123.72 | C | T |
| 08-123340602-N | 125.79 | T | C |
| 09-005920375-M | 5.99 | A | G |
| 09-029233439-N | 28.93 | A | G |
| 09-037841497-M | 37.47 | C | T |
| 09-044591533-N | 44.14 | C | T |
| 09-046117336-N | 45.67 | G | A |
| 09-051115796-M | 50.59 | A | G |
| 09-052894456-M | 52.36 | A | C |
| 09-053790242-M | 53.27 | C | T |
| 09-055476192-G | 55.16 | G | C |
| 09-057114504-M | 56.43 | T | C |
| 09-061963099-M | 61.25 | T | C |
| 09-063923771-M | 63.2 | G | A |
| M-04819_1 | 78.99 | T | C |
| 09-079909549-M | 100.88 | T | G |
| 09-122337931-M | 120.83 | A | G |
| 10-006702399-N | 3.5 | T | A |
| 10-020086252-M | 19.92 | C | T |
| 10-024984063-N | 25 | T | C |
| 10-038734609-N | 38.69 | T | C |
| 10-045078228-M | 44.69 | G | A |
| 10-070466216-N | 69.87 | A | G |
| 10-086567143-M | 85.85 | T | C |
| 10-091119681-M | 90.38 | T | G |
| 10-108166251-N | 108.17 | C | T |
| 10-128874353-N | 127.65 | A | T |
| 11-008353761-M | 8.35 | C | G |
| 11-026438204-M | 26.31 | G | A |
| 11-030321352-G | 30.06 | C | T |
| 11-033040833-M | 32.95 | T | C |
| 11-036243539-M | 35.94 | C | G |
| 11-040303747-M | 39.78 | T | A |
| 11-051340929-G | 50.56 | T | G |
| 11-054801294-M | 54.13 | A | G |
| 11-057005736-N | 56.33 | G | A |
| 11-064063416-M | 63.43 | T | G |
| 11-067354464-M | 66.59 | A | G |
| 11-072769004-N | 71.98 | T | C |
| 11-077198334-M | 76.38 | A | G |
| 11-083523677-M | 82.68 | C | G |
| 11-087398852-M | 86.55 | T | C |
| 11-093918880-N | 93.03 | T | C |
| 11-097282274-M | 96.39 | T | C |
| 11-099321119-G | 98.34 | G | A |
| 11-105115683-N | 104.19 | G | A |
| 11-108428031-M | 107.48 | C | T |
| 11-118804416-N | 117.76 | A | G |
| 12-003567042-M | 3.7 | T | G |
| 12-026312484-M | 32.89 | G | C |
| 12-045157254-N | 51.84 | T | C |
| 12-065480669-M | 71.95 | T | C |
| 12-081758527-M | 88.39 | G | A |
| 12-088106099-G | 95.4 | T | C |
| 12-092440423-M | 99.54 | C | G |
| 12-093343521-M | 100.44 | A | G |
| 12-094386176-N | 101.45 | A | G |
| 12-095091501-N | 102.15 | G | T |
| 12-102404294-M | 109.39 | C | A |
| 12-104882822-M | 111.85 | T | C |
| 12-107541607-M | 114.5 | C | T |
| 13-003966099-M | 4.16 | G | A |
| M-68896_151_1 | 21.38 | C | T |
| 13-037832161-M | 38.52 | T | A |
| 13-056700488-N | 57.66 | A | G |
| 13-094920623-M | 98.34 | G | A |
| 13-117094028-M | 120.25 | A | G |
| 14-003066925-M | 8.61 | C | T |
| 14-022368155-N | 28.44 | T | C |
| 14-025184538-M | 30.9 | G | A |
| 14-027156097-M | 32.87 | G | A |
| 14-029078879-M | 34.78 | G | C |
| 14-030225443-M | 35.93 | A | G |
| 14-031978791-N | 37.69 | G | A |
| 14-033881274-G | 39.96 | A | T |
| 14-035928972-G | 42 | T | A |
| 14-054014360-M | 63.54 | G | C |
| 14-055918382-M | 65.43 | C | T |
| 14-059906359-N | 69.38 | C | A |
| 14-062668837-N | 72.14 | C | G |
| 14-065110474-M | 74.59 | T | C |
| 14-068974190-M | 78.44 | G | C |
| 14-072865727-N | 82.71 | C | T |
| 14-077156430-M | 86.44 | T | C |
| 14-080955404-M | 90.21 | A | C |
| 14-083150973-M | 92.4 | A | G |
| 14-086928226-M | 96.17 | A | G |
| 14-093080383-M | 102.3 | A | G |
| 14-114403652-M | 123.55 | T | C |
| 15-003094890-M | 3.22 | G | A |
| 15-022857571-N | 22.84 | T | C |
| 15-025222813-G | 25.2 | T | G |
| 15-027125833-G | 27.1 | G | A |
| 15-030334445-M | 30.19 | G | T |
| 15-033125499-M | 32.96 | G | A |
| 15-037167914-N | 36.99 | T | C |
| 15-041051689-M | 40.71 | C | G |
| 15-043015319-M | 42.66 | C | G |
| 15-046999017-N | 46.63 | G | A |
| 15-048010467-M | 47.63 | C | T |
| 15-051946000-M | 51.57 | C | A |
| 15-055111506-N | 54.58 | C | T |
| 15-059754938-N | 59.16 | T | C |
| 15-061347157-M | 60.75 | G | T |
| 15-066773519-G | 66.41 | A | T |
| 15-069647296-G | 69.28 | T | G |
| 15-071973707-N | 71.35 | G | T |
| 15-075635928-N | 74.99 | T | C |
| 15-077232216-N | 76.83 | C | T |
| 15-087100507-M | 86.13 | A | G |
| 15-097455228-N | 96.41 | T | C |
| 15-098621793-N | 97.54 | T | C |
| 16-005053446-N | 5.6 | T | G |
| 16-025179119-N | 25.41 | C | G |
| 16-043075679-N | 43.24 | G | A |
| 16-061226828-N | 60.95 | A | T |
| 16-080711577-N | 80.19 | G | A |
| 17-003335010-M | 5.89 | C | G |
| 17-008378982-M | 9.2 | C | T |
| 17-013835072-N | 15.47 | C | T |
| 17-016971865-G | 18.6 | A | C |
| 17-021662242-G | 22.99 | C | T |
| 17-023157746-M | 24.11 | T | A |
| 17-025166339-M | 26.12 | G | A |
| 17-027262193-M | 28.2 | T | C |
| 17-035754851-G | 37.27 | T | C |
| 17-039842179-N | 40.98 | C | T |
| 17-045146746-M | 46.26 | T | A |
| 17-048262313-M | 49.36 | A | G |
| 17-050794277-N | 51.88 | A | C |
| 17-061397942-G | 63.32 | C | T |
| 17-065004394-N | 66.24 | T | C |
| 17-067130590-M | 68.35 | A | T |
| 17-070197589-M | 71.41 | C | G |
| 17-076128192-M | 77.33 | A | G |
| 17-080241937-M | 81.36 | G | A |
| 17-082297869-M | 83.41 | G | T |
| 17-085498773-M | 86.6 | A | G |
| 17-087596269-G | 89.29 | T | C |
| 17-092673068-N | 93.6 | G | T |
| 18-009948695-M | 10.08 | T | A |
| 18-030864114-M | 30.86 | C | T |
| 18-049823654-M | 49.75 | T | C |
| 18-070565016-N | 70.39 | T | C |
| 18-090060367-M | 89.63 | T | G |
| 19-007376322-N | 3.46 | T | C |
| 19-021081804-M | 21.51 | G | A |
| 19-031186563-M | 31.48 | A | G |
| 19-055043545-M | 55.1 | G | A |
| 19-058179075-M | 58.2 | A | G |
| 19-060823449-N | 60.84 | G | A |
| X-008280846-M | 10.77 | G | A |
| X-074884405-N | 87.44 | A | G |
| X-131785813-N | 148.33 | T | C |
